# Supplementary material for: The Efficacy and Safety of Traditional Chinese Medicine Qufenghuoxue Formula on Peripheral Neuropathy Induced by Paclitaxel in Advanced Lung Cancer：A Randomized Clinical Trial
Source: Research Square preprint supplement (doi:10.21203/rs.3.rs-6802916/v1), 2025-07-18
Supplement: Supplementary file 1 [file 78aa21359d7e13d7a2e2394f.docx]

**The Efficacy and Safety of Traditional Chinese Medicine Qufenghuoxue Formula on Peripheral Neuropathy Induced by Paclitaxel in Advanced Lung Cancer：A Randomized Clinical Trial**

Yijun Song1#, Zhidan Hua2#, Mengting Sun1#, Nuo Xu1, Xinyuan Lu3, Dawei Yang1,4*, Xixi Gu5*, Yuanlin Song1,4*, Jun She1*

1 Department of Pulmonary and Critical Care Medicine, Zhongshan Hospital, Fudan University, Shanghai, China

2 Department of Pulmonary and Critical Care Medicine, Quzhou People’s Hospital, Wenzhou Medical University, Quzhou, Zhejiang, China

3 School of Public Health, Key Laboratory of Public Health Safety, Ministry of Education, Fudan University, Shanghai, PR China

4 Department of Pulmonary and Critical Care Medicine, Zhongshan Hospital (Xiamen), Fudan University, Xiamen, China

5 Department of Traditional Chinese Medicine, Zhongshan Hospital, Fudan University, Shanghai, China

* **Corresponding to:** Jun She; Yuanlin Song; Dawei Yang. Department of Pulmonary and Critical Care Medicine, Zhongshan Hospital, Fudan University, 180 Fenglin Road, Shanghai 200032, China. Email: [she.jun@zs-hospital.sh.cn](mailto:she.jun@zs-hospital.sh.cn); [song.yuanlin@zs-hospital.sh.cn](mailto:song.yuanlin@zs-hospital.sh.cn); [yang.dawei@zs-hospital.sh.cn](mailto:yang.dawei@zs-hospital.sh.cn).

Xixi Gu. Department of Traditional Chinese Medicine, Zhongshan Hospital, Fudan University, 180 Fenglin Road, Shanghai 200032, China. Email: [gu.xixi@zs-hospital.sh.cn](mailto:gu.xixi@zs-hospital.sh.cn).

**Supplementary Data**

Supplementary table 1: The list of Chinese and English names and doses of herbs used in Qufenghuoxue formula

Supplementary table 2: Definition of sensory peripheral neuropathy and motor peripheral neuropathy in the standards of NCI-CTCAE version 5

Supplementary table 3: NTx subscale of the Functional Assessment of Cancer Therapy/Gynecologic Oncology Group–Neurotoxicity (FACT/GOG-Ntx)

Supplementary table 4: The Neuropathy Pain Scale (NPS)

Supplementary table 5: The Quality of Life (QoL) scale for cancer patients

Supplementary table 6: Univariable analysis of independent variables associated to CIPN relief

Supplementary table 7: Multivariable analysis of independent variables associated to CIPN relief

Supplementary table 8: Cox regression analysis of independent variables associated to CIPN relief after considering CIPN relief time

Supplementary table 9: Cox regression analysis of the occurrence of paclitaxel dose reductions/cessation to control for potential confounders

Supplementary table 10: Multiple linear regression analysis of the risk factors of FACT/GOG-Ntx, NPS and QoL scales

Supplementary table 1: The list of Chinese and English names and doses of herbs used in Qufenghuoxue formula

| No. | Chinese name | Pinyin | English name | Dose |
| --- | --- | --- | --- | --- |
| 1 | 黄芪 | Huangqi | Radix Astragali | 30 g |
| 2 | 桂枝 | Guizhi | Ramulus Cinnamomi | 15 g |
| 3 | 土鳖虫 | Tubiechong | Ground Beetle | 15 g |
| 4 | 赤芍 | Chishao | Radix Paeoniae Rubra | 15 g |
| 5 | 豨莶草 | Xixiancao | Herba Siegesbeckiae | 30 g |
| 6 | 鸡血藤 | Jixueteng | Suberect Spatholobus Stem | 30 g |
| 7 | 皂角刺 | Zaojiaoci | Chinese Honeylocust Spine | 10 g |
| 8 | 路路通 | Lulutong | Beartiful Sweetgum Fruit | 10 g |
| 9 | 王不留行 | Wangbuliuxing | Semen Vaccariae | 10 g |

Procedures of intervention are as follows:

The study group was given the hands and feet immersion of the decoction with Qufenghuoxue formula, which was composed of nine traditional Chinese medicine (TCM) including Huangqi, Guizhi, Tubiechong, Chishao, Xixiancao, Jixueteng, Zaojiaoci, Lulutong and Wangbuliuxing. Each unit of formula could yield 2000 mL of decoction, and the procedure of hands and feet immersion of TCM decoction is as follows: First, boil the medicine over moderate heat, then decoct it for 30 minutes; Secondly, pour the decoction and dregs of the medicine (about 2000ml) into a bucket; Thirdly, soak the hands and feet (4-5 cm above the joints) in the decoction twice per day for about 30 minutes each time and keep the temperature at about 40℃. Vitamin B1 group was given 10 mg of vitamin B1 orally three times per day. Warm water group was given the hands and feet immersion of hot water twice per day for 30 minutes each time. Patients should soak the hands and feet (4-5 cm above the joints) in warm water with the temperature at about 40℃.

Supplementary table 2: Definition of sensory peripheral neuropathy and motor peripheral neuropathy in the standards of NCI-CTCAE version 5

| Scale | Sensory peripheral neuropathy | Motor peripheral neuropathy |
| --- | --- | --- |
| Grade 1 | Asymptomatic | Asymptomatic;  clinical or diagnostic observations only |
| Grade 2 | Moderate symptoms;  limiting instrumental ADL | Moderate symptoms;  limiting instrumental ADL |
| Grade 3 | Severe symptoms;  limiting self-care ADL | Severe symptoms;  limiting self-care ADL |
| Grade 4 | Life-threatening consequences;  urgent intervention indicated | Life-threatening consequences;  urgent intervention indicated |
| Grade 5 | / | Death |

Abbreviations: NCI-CTCAE, National Cancer Institute-Common Terminology Criteria for Adverse Events; ADL, activities of daily living

Supplementary table 3: NTx subscale of the Functional Assessment of Cancer Therapy/Gynecologic Oncology Group–Neurotoxicity (FACT/GOG-Ntx)

| No. | Domains | Not at all | A little bit | Somewhat | Quite a bit | Very much |
| --- | --- | --- | --- | --- | --- | --- |
| NTX1 | I have numbness or tingling in my hands | 0 | 1 | 2 | 3 | 4 |
| NTX2 | I have numbness or tingling in my feet | 0 | 1 | 2 | 3 | 4 |
| NTX3 | I feel discomfort in my hands | 0 | 1 | 2 | 3 | 4 |
| NTX4 | I feel discomfort in my feet | 0 | 1 | 2 | 3 | 4 |
| NTX5 | I have joint pain or muscle cramps | 0 | 1 | 2 | 3 | 4 |
| H112 | I feel weak all over | 0 | 1 | 2 | 3 | 4 |
| NTX6 | I have trouble hearing | 0 | 1 | 2 | 3 | 4 |
| NYX7 | I get a ringing or buzzing in my ears | 0 | 1 | 2 | 3 | 4 |
| NTX8 | I have trouble buttoning buttons | 0 | 1 | 2 | 3 | 4 |
| NTX9 | I have trouble feeling the shape of small objects when they are in my hand | 0 | 1 | 2 | 3 | 4 |
| An6 | I have trouble walking | 0 | 1 | 2 | 3 | 4 |

Supplementary table 4: The Neuropathy Pain Scale (NPS)

| No. | Domains | Scale | | | | | | | | | | |
| --- | --- | --- | --- | --- | --- | --- | --- | --- | --- | --- | --- | --- |
| 1 | Intensity | 0 | 1 | 2 | 3 | 4 | 5 | 6 | 7 | 8 | 9 | 10 |
| 2 | Sharpness | 0 | 1 | 2 | 3 | 4 | 5 | 6 | 7 | 8 | 9 | 10 |
| 3 | Hotness | 0 | 1 | 2 | 3 | 4 | 5 | 6 | 7 | 8 | 9 | 10 |
| 4 | Dullness | 0 | 1 | 2 | 3 | 4 | 5 | 6 | 7 | 8 | 9 | 10 |
| 5 | Coldness | 0 | 1 | 2 | 3 | 4 | 5 | 6 | 7 | 8 | 9 | 10 |
| 6 | Sensitivity | 0 | 1 | 2 | 3 | 4 | 5 | 6 | 7 | 8 | 9 | 10 |
| 7 | Itchy | 0 | 1 | 2 | 3 | 4 | 5 | 6 | 7 | 8 | 9 | 10 |
| 8 | Unpleasantness of pain | 0 | 1 | 2 | 3 | 4 | 5 | 6 | 7 | 8 | 9 | 10 |
| 9 | Intensity of deep Pain | 0 | 1 | 2 | 3 | 4 | 5 | 6 | 7 | 8 | 9 | 10 |
| 10 | Intensity of surface Pain | 0 | 1 | 2 | 3 | 4 | 5 | 6 | 7 | 8 | 9 | 10 |

Supplementary table 5: The Quality of life (QoL) scale for cancer patients

| No. | Domains | Scale | | | | |
| --- | --- | --- | --- | --- | --- | --- |
| 1 | Appetite | 1 | 2 | 3 | 4 | 5 |
| 2 | Mental state | 1 | 2 | 3 | 4 | 5 |
| 3 | Sleep | 1 | 2 | 3 | 4 | 5 |
| 4 | Fatigue | 1 | 2 | 3 | 4 | 5 |
| 5 | Pain | 1 | 2 | 3 | 4 | 5 |
| 6 | Family understanding and cooperation | 1 | 2 | 3 | 4 | 5 |
| 7 | Colleague understanding and cooperation | 1 | 2 | 3 | 4 | 5 |
| 8 | Personal understanding of cancer | 1 | 2 | 3 | 4 | 5 |
| 9 | Attitude to treatment | 1 | 2 | 3 | 4 | 5 |
| 10 | Activities of daily living | 1 | 2 | 3 | 4 | 5 |
| 11 | Side effects of treatment | 1 | 2 | 3 | 4 | 5 |
| 12 | Facial expressions | 1 | 2 | 3 | 4 | 5 |

Supplementary table 6: Univariable analysis of independent variables associated to CIPN relief

| Variables | No CIPN relief  (n = 177) | CIPN relief  (n = 50) | *P* value |
| --- | --- | --- | --- |
| Age (years old) | 60.22±9.5 | 61.9±8.92 | 0.265 |
| Intervention |  |  | ＜0.001 |
| TCM | 37(20.9) | 35(70) |  |
| Vitamin B1 | 66(37.3) | 9(18) |  |
| Warm water | 74(41.8) | 6(12) |  |
| Gender |  |  | 0.309 |
| Male | 145(81.9) | 44(88) |  |
| Female | 32(18.1) | 6(12) |  |
| BMI (kg/m2) |  |  | 0.421 |
| ＜18.5 | 5(2.8) | 0(0) |  |
| 18.5~23.9 | 94(53.1) | 24(48) |  |
| ≥24.0 | 78(44.1) | 26(52) |  |
| Diabetes |  |  | 0.845 |
| No | 165(93.2) | 47(94) |  |
| Yes | 12(6.8) | 3(6) |  |
| Prior neuropathy |  |  | 0.692 |
| No | 161(91) | 47(94.0) |  |
| Yes | 16(9) | 3(6.0) |  |
| Histology |  |  | 0.328 |
| Adenocarcinoma | 57(32.2) | 12(24) |  |
| Squamous cell carcinoma | 82(46.3) | 27(54) |  |
| Neuroendocrine carcinoma | 26(14.7) | 10(20) |  |
| Others | 12(6.8) | 1(2) |  |
| Cancer stage |  |  | 0.918 |
| Ⅲ | 33(18.6) | 9(18) |  |
| Ⅳ | 144(81.4) | 41(82) |  |
| Tumor status |  |  | 0.01 |
| Progression disease | 20(11.3) | 2(4) |  |
| Stable disease | 102(57.6) | 21(42) |  |
| Partial response | 55(31.1) | 27(54) |  |
| ECOG performance score |  |  | 0.831 |
| 0 | 9(5.1) | 2(4) |  |
| 1 | 82(46.3) | 26(52) |  |
| 2 | 86(48.6) | 22(44) |  |
| Treatment lines |  |  | 0.472 |
| 1 | 89(50.3) | 28(56) |  |
| 2 | 62(35) | 15(30) |  |
| 3 | 19(10.7) | 7(14) |  |
| 4 | 7(4) | 0(0) |  |
| Chemotherapy cycles |  |  | 0.816 |
| 5 | 7(4) | 3(6.0) |  |
| 6 | 170(96) | 47(94.0) |  |
| Platinum |  |  | 0.39 |
| No | 36(20.3) | 13(26.0) |  |
| Yes | 141(79.7) | 37(74.0) |  |
| Immunotherapy |  |  | 0.234 |
| No | 112(63.3) | 27(54.0) |  |
| Yes | 65(36.7) | 23(46.0) |  |
| Antiangiogenic drugs |  |  | 0.062 |
| No | 148(83.6) | 47(94.0) |  |
| Yes | 29(16.4) | 3(6.0) |  |
| Types of paclitaxel |  |  | 0.752 |
| nab-PTX | 168(94.9) | 48(96.0) |  |
| Docetaxel | 9(5.1) | 2(4.0) |  |
| Dose reductions/cessation of paclitaxel |  |  | 0.79 |
| No | 124(70.1) | 36(72.0) |  |
| Yes | 53(29.9) | 14(28.0) |  |
| Time of dose reductions/cessation | 10.4±2.99 | 10.56±2.98 | 0.747 |
| Dose reductions/cessation cycles |  |  | 0.315 |
| 0 | 124(70.1) | 36(72.0) |  |
| 1 | 6(3.4) | 0(0) |  |
| 2 | 4(2.3) | 2(4.0) |  |
| 3 | 22(12.4) | 3(6.0) |  |
| 4 | 21(11.9) | 9(18.0) |  |

Abbreviations: CIPN, chemotherapy-induced peripheral neuropathy; TCM, traditional Chinese medicine; BMI, body mass index; ECOG, Eastern Cooperative Oncology Group; nab-PTX, nanoparticle albumin-bound paclitaxel

Supplementary table 7: Multivariable analysis of independent variables associated to CIPN relief

| Variables | B | S.E, | Wals | OR | 95% CI | *P* value |
| --- | --- | --- | --- | --- | --- | --- |
| estimate | -3.819 | 0.903 | 17.884 | 0.022 | —— | ＜0.001 |
| Intervention | | | | | | |
| TCM | 2.692 | 0.514 | 27.445 | 14.762 | 5.392 to 40.417 | ＜0.001 |
| Vitamin B1 | 0.618 | 0.567 | 1.188 | 1.855 | 0.611 to 5.638 | 0.276 |
| Warm water | ref | ref | ref | ref | ref | ref |
| Tumor status | | | | | | |
| PD | -2.033 | 0.843 | 5.818 | 0.131 | 0.025 to 0.683 | 0.016 |
| SD | -1.105 | 0.396 | 7.772 | 0.331 | 0.152 to 0.720 | 0.005 |
| PR | ref | ref | ref | ref | ref | ref |
| Antiangiogenic drugs | | | | | | |
| No | ref | ref | ref | ref | ref | ref |
| Yes | -1.481 | 0.693 | 4.572 | 0.227 | 0.058 to 0.884 | 0.032 |

Abbreviations: CIPN, chemotherapy-induced peripheral neuropathy; TCM, traditional Chinese medicine; PD, progression disease; SD, stable disease; PR, partial response; S.E, standard error; OR, odds ratio; CI, confidence interval

Supplementary table 8: Cox regression analysis of independent variables associated to CIPN relief after controlling for CIPN relief time

| Variables | B | S.E, | Wald | HR | 95% CI | *P* value |
| --- | --- | --- | --- | --- | --- | --- |
| Intervention | | | | | | |
| TCM | 2.279 | 0.444 | 26.317 | 9.762 | 4.088 to 23.314 | ＜0.001 |
| Vitamin B1 | 0.544 | 0.527 | 1.065 | 1.723 | 0.613 to 4.846 | 0.302 |
| Warm water | ref | ref | ref | ref | ref | ref |
| Age (years old) | 0.013 | 0.016 | 0.677 | 1.013 | 0.982 to 1.045 | 0.411 |
| Tumor status | | | | | | |
| PD | -1.756 | 0.74 | 5.636 | 0.173 | 0.041 to 0.736 | 0.018 |
| SD | -0.78 | 0.293 | 7.072 | 0.459 | 0.258 to 0.815 | 0.008 |
| PR | ref | ref | ref | ref | ref | ref |
| Antiangiogenic drugs | | | | | | |
| No | ref | ref | ref | ref | ref | ref |
| Yes | -1.059 | 0.62 | 2.915 | 0.347 | 0.103 to 1.17 | 0.088 |

Abbreviations: CIPN, chemotherapy-induced peripheral neuropathy; TCM, traditional Chinese medicine; PD, progression disease; SD, stable disease; PR, partial response; S.E, standard error; HR, hazard ratio; CI, confidence interval

Supplementary table 9: Cox regression analysis of the occurrence of paclitaxel dose reductions/cessation to control for potential confounders

| Univariate analysis | B | Se | Wald | HR | 95% CI | *P* value |
| --- | --- | --- | --- | --- | --- | --- |
| Intervention | | | | | | |
| TCM | -1.012 | 0.351 | 8.312 | 0.363 | 0.183 to 0.723 | 0.004 |
| Vitamin B1 | -0.53 | 0.296 | 3.197 | 0.589 | 0.329 to 1.052 | 0.074 |
| Warm water | ref | ref | ref | ref | ref | ref |
| Multivariate analysis | B | Se | Wald | HR | 95% CI | *P* value |
| Intervention |  |  |  |  |  |  |
| TCM | -1.092 | 0.353 | 9.589 | 0.336 | 0.168 to 0.67 | 0.002 |
| Vitamin B1 | -0.575 | 0.297 | 3.741 | 0.563 | 0.314 to 1.008 | 0.053 |
| Warm water | ref | ref | ref | ref | ref | ref |
| Age (years old) | 0.07 | 0.015 | 20.436 | 1.073 | 1.04 to 1.106 | ＜0.001 |
| Tumor status | | | | | | |
| PD | -0.211 | 0.456 | 0.213 | 0.81 | 0.331 to 1.98 | 0.644 |
| SD | -0.382 | 0.275 | 1.933 | 0.683 | 0.399 to 1.169 | 0.164 |
| PR | ref | ref | ref | ref | ref | ref |

Abbreviations: TCM, traditional Chinese medicine; PD, progression disease; SD, stable disease; PR, partial response; Se, standard error; HR, hazard ratio; CI, confidence interval

Supplementary table 10: Multiple linear regression analysis of the risk factors of FACT/GOG-Ntx, NPS and QoL scales

| Variables | B | Se | t | *P* value | 95% CI |
| --- | --- | --- | --- | --- | --- |
| FACT/GOG-Ntx R2=0.605，F=11.798，P＜0.001 | | | | | |
| constant | 18.486 | 10.598 | 1.744 | 0.083 | -2.413 to 39.385 |
| Intervention | | | | | |
| TCM | -11.174 | 0.74 | -15.104 | ＜0.001 | -12.633 to -9.715 |
| Vitamin B1 | -2.248 | 0.729 | -3.086 | 0.002 | -3.684 to -0.811 |
| Warm water | ref | ref | ref | ref | ref |
| Age (years old) | 0.147 | 0.041 | 3.589 | ＜0.001 | 0.066 to 0.228 |
| Tumor status | | | | | |
| PD | ref | ref | ref | ref | ref |
| SD | -2.818 | 1.113 | -2.532 | 0.012 | -5.012 to -0.624 |
| PR | -2.641 | 1.148 | -2.3 | 0.022 | -4.905 to -0.377 |
| NPS R2=0.511，F=8.044, *P* < 0.001 | | | | | |
| constant | 38.972 | 16.02 | 2.433 | 0.016 | 7.382 to 70.562 |
| Intervention | | | | | |
| TCM | -12.567 | 1.118 | -11.238 | ＜0.001 | -14.773 to -10.362 |
| Vitamin B1 | -1.867 | 1.101 | -1.696 | 0.092 | -4.039 to 0.304 |
| Warm water | ref | ref | ref | ref | ref |
| Histology | | | | | |
| ADE | 8.402 | 3.449 | 2.436 | 0.016 | 1.6,15 to 204 |
| SCC | -0.355 | 2.611 | -0.136 | 0.892 | -5.503 to 4.793 |
| NEC | 6.435 | 3.769 | 1.707 | 0.089 | -0.997 to 13.867 |
| Others | ref | ref | ref | ref | ref |
| Treatment lines | | | | | |
| 1 | ref | ref | ref | ref | ref |
| 2 | -11.391 | 2.946 | -3.867 | ＜0.001 | -17.2 to -5.582 |
| 3 | -3.492 | 2.96 | -1.18 | 0.239 | -9.329 to 2.345 |
| 4 | -6.742 | 4.081 | -1.652 | 0.1 | -14.79 to 1.306 |
| QoL R2=0.538，F=8.942, *P* < 0.001 | | | | | |
| constant | 23.099 | 10.659 | 2.167 | 0.031 | 2.08 to 44.118 |
| Intervention | | | | | |
| TCM | 9.11 | 0.744 | 12.243 | ＜0.001 | 7.642 to 10.577 |
| Vitamin B1 | 2.657 | 0.733 | 3.627 | ＜0.001 | 1.213 to 4.102 |
| Warm water | ref | ref | ref | ref | ref |
| Histology | | | | | |
| ADE | -3.613 | 2.295 | -1.574 | 0.117 | -8.138 to 0.913 |
| SCC | 3.513 | 1.737 | 2.022 | 0.044 | 0.088 to 6.939 |
| NEC | -2.107 | 2.508 | -0.84 | 0.402 | -7.052 to 2.838 |
| Others | ref | ref | ref | ref | ref |
| Treatment lines | | | | | |
| 1 | ref | ref | ref | ref | ref |
| 2 | 8.611 | 1.96 | 4.393 | ＜0.001 | 4.746 to 12.476 |
| 3 | 4.5 | 1.969 | 2.285 | 0.023 | 0.617 to 8.384 |
| 4 | 1.181 | 2.716 | 0.435 | 0.664 | -4.174 to 6.535 |

Abbreviations: FACT/GOG-Ntx, Functional Assessment of Cancer Therapy/Gynecologic Oncology Group-Neurotoxicity; NPS, Neuropathy Pain Scale; QoL, quality of life; PD, progression disease; SD, stable disease; PR, partial response; Se, standard error; CI, confidence interval; TCM, traditional Chinese medicine; ADE, adenocarcinoma; SCC, squamous cell carcinoma; NEC, neuroendocrine carcinoma
